# Supplementary material for: Prevalence and Predictors of Subclinical Micronutrient Deficiency in German Older Adults: Results from the Population-Based KORA-Age Study
Source: MDPI journal article supplement (doi:10.3390/nu9121276), 2017-11-23
Supplement: s1 [file s1]

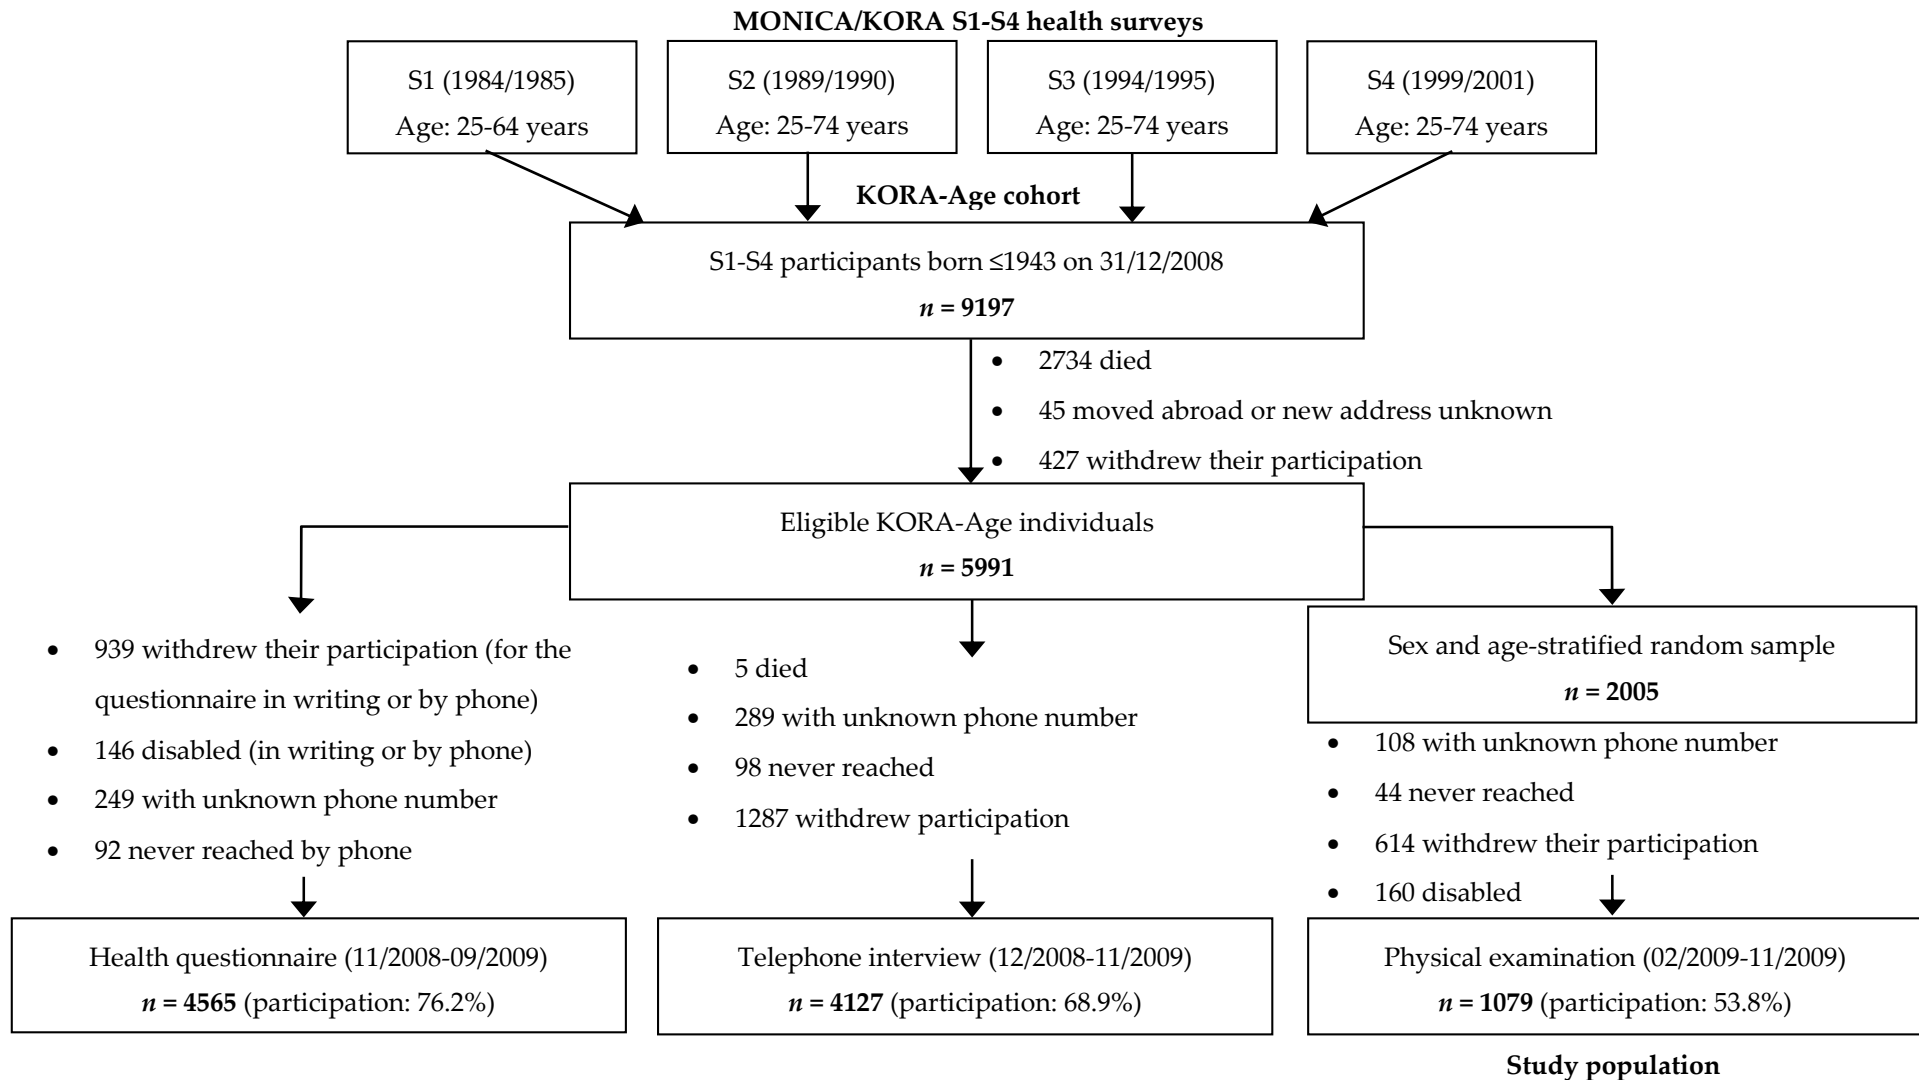

**Figure S1:** Flowchart of the KORA-Age 2008/2009 recruitment and retention profile.

**Table S1:** Description of data collection and categorization methods for the investigated predictors in KORA-Age 2008/2009.

| Predictor                            | Collection Method    | Assessment Method                                                                                                                                             | Categories                                                                                                                                                                                                                                                                            |
|--------------------------------------|----------------------|---------------------------------------------------------------------------------------------------------------------------------------------------------------|---------------------------------------------------------------------------------------------------------------------------------------------------------------------------------------------------------------------------------------------------------------------------------------|
| <b>Socio-demographic factors</b>     |                      |                                                                                                                                                               |                                                                                                                                                                                                                                                                                       |
| Sex                                  | Telephone interview  | Short form of the Demographic Standards of the German Society of Epidemiology [1]                                                                             | Men; women                                                                                                                                                                                                                                                                            |
| Age groups (years)                   | Telephone interview  | Same as sex                                                                                                                                                   | 65-74; 75-84; 85-93                                                                                                                                                                                                                                                                   |
| Family status                        | Telephone interview  | Same as sex                                                                                                                                                   | Living with a partner; living alone, divorced or widowed                                                                                                                                                                                                                              |
| Educational level (years)            | Telephone interview  | Estimated by recording years of school completed                                                                                                              | Medium to high (10 to 17); low (8 to 9)                                                                                                                                                                                                                                               |
| <b>Lifestyle factors</b>             |                      |                                                                                                                                                               |                                                                                                                                                                                                                                                                                       |
| Nutritional status (GNRI)            | Physical examination | Derived by combining information on albumin level, weight and height, defined in [2]                                                                          | No risk (>98); low risk (92 to 98); moderate/ major risk (<92)                                                                                                                                                                                                                        |
| Nutritional status (Nutrition Score) | Telephone interview  | Short version of SCREEN II questionnaire covering eating habits (e.g. skipping meals, appetite, daily intake of fruits and vegetables) [3]                    | Low risk (41 to 48); medium risk (36 to <41); high risk (<36)                                                                                                                                                                                                                         |
| Physical activity                    | Telephone interview  | Two four-category questions on time spent per week on sport activities in summer and winter, respectively [4]                                                 | Very active (regular sports in summer and winter for >2 hours/week in both seasons) or moderately active (regular sports for ~1 hour/week in at least one season); less active (irregular sports for ~1 hour/week in at least one season) or inactive (no sports in summer or winter) |
| Alcohol consumption (g/day)          | Physical examination | Self-reported amount of alcoholic drinks consumed (beer, wine and spirits) based on the last weekend and the last weekday using a validated recall method [5] | 0; >0 to <20; ≥20                                                                                                                                                                                                                                                                     |
| Smoking status                       | Health questionnaire | Questions: 1) Have you smoked more than 100 cigarettes in your life? 2) Do you smoke cigarettes at the moment? 3) Do you smoke regularly or occasionally? [6] | Never smoker (if answer 'no' to question 1); ex-smoker (if answer 'yes' to question 1 but answer 'no' to question 2); current smoker (if answer 'regularly' or 'occasionally' to question 3)                                                                                          |

Table S1: Cont.

| Predictor                         | Collection Method                          | Assessment Method                                                                                                                                                                                                                                                                                                        | Categories                                                                                                                                                     |
|-----------------------------------|--------------------------------------------|--------------------------------------------------------------------------------------------------------------------------------------------------------------------------------------------------------------------------------------------------------------------------------------------------------------------------|----------------------------------------------------------------------------------------------------------------------------------------------------------------|
| <b>Health factors</b>             |                                            |                                                                                                                                                                                                                                                                                                                          |                                                                                                                                                                |
| BMI (kg/m <sup>2</sup> )          | Physical examination                       | Body weight in kilograms divided by squared height in meters                                                                                                                                                                                                                                                             | According to WHO: normal (18.5 to <25); overweight (25 to <30); obese (≥30). One individual with a BMI of 18.3 was added to the category normal (18.5 to <25). |
| Frailty                           | Physical examination                       | Adapted version of the frailty phenotype proposed by Fried et al. [7], defined by the presence of ≥3 criteria: weight loss (>5 kg in the past 6 months), exhaustion, low physical activity (by self-report), low walking speed and weakness (as measured by grip strength)                                               | Non-frail (no criteria); pre-frail (1-2 criteria); frail (≥3 criteria)                                                                                         |
| Polypharmacy                      | Physical examination                       | Use of ≥5 medications, taken regularly and prescribed (without herbal or homeopathic medications)                                                                                                                                                                                                                        | No; yes                                                                                                                                                        |
| eGFR (mL/min/1.73m <sup>2</sup> ) | Physical examination                       | Estimated from serum creatinine (mg/dL) according to formulas described in [8]                                                                                                                                                                                                                                           | Normal (≥60); low (<60)                                                                                                                                        |
| Multi-morbidity                   | Health questionnaire + telephone interview | Suffering from ≥2 morbidities including hypertension, eye disease, heart disease, diabetes mellitus, joint disease, lung disease, gastrointestinal disease, mental disease, stroke, cancer, kidney disease, neurological disease, liver disease [9]                                                                      | No disease; one disease; two or more diseases                                                                                                                  |
| Use of supplements                | Physical examination                       | Use of medications and supplements ingested in the last 7 days collected through a database supported computer software (IDOM) [10], together with mode, dosage and frequency of ingestion [11]. Micronutrient composition of supplements available from a database established by Helmholtz Zentrum München staff [11]. | Regular intake; no/irregular intake                                                                                                                            |

GNRI: Geriatric Nutritional Risk Index; SCREEN II: Seniors in the Community Risk Evaluation for Eating and Nutrition, version II; BMI: body mass index; WHO: World Health Organization; eGFR: estimated glomerular filtration rate; IDOM: Instrument for Databased Assessment Of Medication

**Table S2:** Unadjusted ORs with 95% CIs for subclinical micronutrient deficiencies by categories of potential predictors: Results from binary logistic regression analyses in KORA-Age 2008/2009.

| Predictor                         | Predictor Categories                                        | Low 25OHD |           |          | Low folate |           |          | Low vitamin B <sub>12</sub> |           |          | Low iron |            |          |
|-----------------------------------|-------------------------------------------------------------|-----------|-----------|----------|------------|-----------|----------|-----------------------------|-----------|----------|----------|------------|----------|
|                                   |                                                             | OR        | 95% CI    | <i>p</i> | OR         | 95% CI    | <i>p</i> | OR                          | 95% CI    | <i>p</i> | OR       | 95% CI     | <i>p</i> |
| <b>Season of blood collection</b> |                                                             |           |           |          |            |           |          |                             |           |          |          |            |          |
| Months of blood collection        | February-May vs June-August                                 | 1.8       | 1.3 – 2.3 | <0.001   | .          | .         | .        | .                           | .         | .        | .        | .          | .        |
| Months of blood collection        | September-November vs June-August                           | 0.9       | 0.7 – 1.3 | 0.713    | .          | .         | .        | .                           | .         | .        | .        | .          | .        |
| <b>Socio-demographic factors</b>  |                                                             |           |           |          |            |           |          |                             |           |          |          |            |          |
| Sex                               | Women vs men                                                | 1.6       | 1.3 – 2.1 | <0.001   | 1.2        | 0.8 – 1.8 | 0.479    | 0.8                         | 0.6 – 1.1 | 0.180    | 0.5      | 0.3 – 0.7  | 0.001    |
| Age groups (years)                | 75-84 vs 65-74                                              | 1.6       | 1.2 – 2.0 | 0.001    | 1.2        | 0.7 – 2.0 | 0.494    | 1.3                         | 0.9 – 1.7 | 0.124    | 1.5      | 1.0 – 2.3  | 0.075    |
| Age groups (years)                | 85-93 vs 65-74                                              | 3.7       | 2.4 – 5.8 | <0.001   | 3.1        | 1.7 – 5.6 | <0.001   | 1.9                         | 1.3 – 2.9 | 0.002    | 2.8      | 1.6 – 4.8  | <0.001   |
| Family status                     | Living alone, divorced or widowed vs living with a partner  | 1.4       | 1.1 – 1.9 | 0.006    | 1.4        | 0.9 – 2.2 | 0.105    | 0.9                         | 0.7 – 1.2 | 0.545    | 1.2      | 0.8 – 1.8  | 0.348    |
| Educational level (years)         | Low (8 to 9) vs medium to high (10 to 17)                   | 1.7       | 1.2 – 2.3 | 0.001    | 1.4        | 0.8 – 2.2 | 0.217    | 1.3                         | 0.9 – 1.7 | 0.161    | 1.0      | 0.6 – 1.7  | 0.850    |
| <b>Lifestyle factors</b>          |                                                             |           |           |          |            |           |          |                             |           |          |          |            |          |
| Nutritional status                | GNRI: Low (92 to 98) vs no risk (>98)                       | 1.0       | 0.6 – 1.7 | 0.923    | 1.3        | 0.5 – 2.8 | 0.614    | 1.0                         | 0.5 – 1.7 | 0.926    | 2.7      | 1.4 – 5.1  | 0.003    |
| Nutritional status                | GNRI : Moderate/major (<92) vs no risk (>98)                | 1.5       | 0.6 – 3.8 | 0.367    | 1.2        | 0.2 – 4.1 | 0.840    | 0.6                         | 0.2 – 1.7 | 0.386    | 4.8      | 1.8 – 11.9 | 0.001    |
| Nutritional status                | Nutrition Score: High (<36) vs low risk (41 to 48)          | 1.5       | 1.1 – 2.0 | 0.019    | 2.0        | 1.2 – 3.5 | 0.012    | 1.2                         | 0.8 – 1.7 | 0.393    | 1.7      | 1.1 – 2.8  | 0.016    |
| Nutritional status                | Nutrition Score: Medium (36 to <41) vs low risk (41 to 48)  | 1.2       | 0.9 – 1.7 | 0.135    | 1.2        | 0.7 – 2.1 | 0.484    | 1.3                         | 1.0 – 1.8 | 0.076    | 0.7      | 0.4 – 1.1  | 0.112    |
| Physical activity                 | Less active or inactive vs very active or moderately active | 2.1       | 1.6 – 2.7 | <0.001   | 2.3        | 1.5 – 3.7 | <0.001   | 1.5                         | 1.1-1.9   | 0.006    | 1.8      | 1.2 – 2.7  | 0.003    |
| Alcohol consumption (g/day)       | >0 to <20 vs 0                                              | 0.8       | 0.6 – 1.0 | 0.056    | 0.9        | 0.5 – 1.4 | 0.571    | 1.1                         | 0.8 – 1.5 | 0.612    | 0.9      | 0.6 – 1.5  | 0.763    |
| Alcohol consumption (g/day)       | ≥20 vs 0                                                    | 0.5       | 0.4 – 0.7 | <0.001   | 0.4        | 0.2 – 0.8 | 0.009    | 1.3                         | 1.0 – 1.9 | 0.083    | 0.9      | 0.6 – 1.5  | 0.750    |
| Smoking status                    | Current smoker vs never smoker                              | 0.8       | 0.4 – 1.4 | 0.345    | 0.9        | 0.3 – 2.4 | 0.893    | 1.6                         | 0.9 – 3.0 | 0.107    | 2.2      | 1.0 – 4.6  | 0.043    |
| Smoking status                    | Former smoker vs never smoker                               | 0.6       | 0.4 – 0.7 | <0.001   | 1.0        | 0.6 – 1.5 | 0.920    | 0.9                         | 0.7 – 1.2 | 0.425    | 1.4      | 0.9 – 2.1  | 0.101    |

Table S2: Cont.

| Predictor                         | Predictor categories                                            | Low 25OHD |         |          | Low folate |          |          | Low vitamin B <sub>12</sub> |          |          | Low iron |          |          |
|-----------------------------------|-----------------------------------------------------------------|-----------|---------|----------|------------|----------|----------|-----------------------------|----------|----------|----------|----------|----------|
|                                   |                                                                 | OR        | 95% CI  | <i>p</i> | OR         | 95% CI   | <i>p</i> | OR                          | 95% CI   | <i>p</i> | OR       | 95% CI   | <i>p</i> |
| <b>Health factors</b>             |                                                                 |           |         |          |            |          |          |                             |          |          |          |          |          |
| BMI (kg/m <sup>2</sup> )          | Overweight (25 to <30) vs normal (18.5 to <25)                  | 1.0       | 0.7–1.4 | 0.953    | 1.1        | 0.6–2.2  | 0.675    | 1.2                         | 0.9–1.8  | 0.287    | 0.7      | 0.5–1.2  | 0.188    |
| BMI (kg/m <sup>2</sup> )          | Obese (≥30) vs normal (18.5 to <25)                             | 1.7       | 1.2–2.5 | 0.003    | 1.6        | 0.8–3.0  | 0.162    | 1.2                         | 0.8–1.8  | 0.378    | 0.5      | 0.3–0.9  | 0.020    |
| Frailty                           | Missing value vs non-frail                                      | 2.0       | 1.2–3.6 | 0.016    | 3.1        | 1.4–6.5  | 0.003    | 1.4                         | 0.7–2.4  | 0.297    | 4.1      | 1.9–8.4  | <0.001   |
| Frailty                           | Pre-frail vs non-frail                                          | 2.2       | 1.7–2.8 | <0.001   | 1.5        | 0.9–2.5  | 0.091    | 1.2                         | 0.9–1.7  | 0.156    | 3.3      | 2.1–5.2  | <0.001   |
| Frailty                           | Frail vs non-frail                                              | 2.9       | 1.6–5.8 | 0.001    | 3.6        | 1.5–7.7  | 0.002    | 1.6                         | 0.8–2.9  | 0.158    | 6.9      | 3.2–14.2 | <0.001   |
| Polypharmacy                      | Yes vs no                                                       | 1.3       | 1.0–1.6 | 0.079    | 1.0        | 0.7–1.6  | 0.852    | 0.6                         | 0.4–0.8  | 0.001    | 2.2      | 1.5–3.2  | <0.001   |
| eGFR (mL/min/1.73m <sup>2</sup> ) | Low (<60) vs normal (≥60)                                       | 1.6       | 1.2–2.1 | 0.001    | 1.5        | 1.0–2.3  | 0.066    | 0.1                         | 0.0–1.0  | 0.990    | 2.0      | 1.3–2.9  | 0.001    |
| Multi-morbidity                   | One disease vs no disease                                       | 1.6       | 1.0–2.7 | 0.049    | 0.8        | 0.3–2.1  | 0.571    | 1.3                         | 0.8–2.2  | 0.361    | 1.3      | 0.5–4.2  | 0.568    |
| Multi-morbidity                   | Two or more disease vs no disease                               | 2.4       | 1.5–3.8 | <0.001   | 1.3        | 0.6–3.1  | 0.571    | 1.0                         | 0.6–1.8  | 0.861    | 2.5      | 1.1–7.3  | 0.051    |
| Use of supplements                | Vitamin D: No/irregular intake vs regular intake                | 3.4       | 2.3–5.2 | <0.001   | .          | .        | .        | .                           | .        | .        | .        | .        | .        |
| Use of supplements                | Folic acid: No/irregular intake vs regular intake               | .         | .       | .        | 3.8        | 1.4–15.6 | 0.026    | .                           | .        | .        | .        | .        | .        |
| Use of supplements                | Vitamin B <sub>12</sub> : No/irregular intake vs regular intake | .         | .       | .        | .          | .        | .        | 4.8                         | 2.5–10.4 | <0.001   | .        | .        | .        |
| Use of supplements                | Iron: No/irregular intake vs regular intake                     | .         | .       | .        | .          | .        | .        | .                           | .        | .        | 4.1      | 0.9–73.7 | 0.164    |

25OHD=25-hydroxyvitamin D; GNRI: Geriatric Nutritional Risk Index; SCREEN II: Seniors in the Community Risk Evaluation for Eating and Nutrition, version II; BMI: body mass index; eGFR: estimated glomerular filtration rate; OR: odds ratio; CI: confidence interval; *p*: p-value; . : not investigated (see Methods); range of *n* for 25OHD: 1030-1040, folate: 1033-1043, vitamin B<sub>12</sub>: 1034-1044, iron: 1040-1050; variables with *p* < 0.25 were selected for multiple logistic regression analysis; cut-offs for subclinical micronutrient deficiency: <50 nmol/L (25OHD); <13.6 nmol/L (folate); <221 pmol/L (vitamin B<sub>12</sub>); men: <11.6 μmol/L, women: <9.0 μmol/L (iron)

**Table S3:** Predictors with  $p < 0.25$  in binary logistic regression which were entered into each multiple logistic regression model

| Low 25OHD                            | Low folate                           | Low vitamin B <sub>12</sub>                   | Low iron                             |
|--------------------------------------|--------------------------------------|-----------------------------------------------|--------------------------------------|
| Months of blood collection           | .                                    | .                                             | .                                    |
| Sex*                                 | Sex**                                | Sex*                                          | Sex*                                 |
| Age groups*                          | Age groups*                          | Age groups*                                   | Age groups*                          |
| Family status                        | Family status                        | -                                             | -                                    |
| Educational level                    | Educational level                    | Educational level                             | -                                    |
| -                                    | -                                    | -                                             | Nutritional status (GNRI)            |
| Nutritional status (Nutrition Score) | Nutritional status (Nutrition Score) | Nutritional status (Nutrition Score)          | Nutritional status (Nutrition Score) |
| Physical activity                    | Physical activity                    | Physical activity                             | Physical activity                    |
| Alcohol consumption                  | Alcohol consumption                  | Alcohol consumption                           | -                                    |
| Smoking status                       | -                                    | Smoking status                                | Smoking status                       |
| BMI                                  | BMI                                  | -                                             | BMI                                  |
| Frailty                              | Frailty                              | Frailty                                       | Frailty                              |
| Polypharmacy                         | -                                    | Polypharmacy                                  | Polypharmacy                         |
| eGFR                                 | eGFR                                 | -                                             | eGFR                                 |
| Multi-morbidity                      | -                                    | -                                             | Multi-morbidity                      |
| Use of supplements (Vitamin D)       | .                                    | .                                             | .                                    |
| .                                    | Use of supplements (Folic acid)      | .                                             | .                                    |
| .                                    | .                                    | Use of supplements (Vitamin B <sub>12</sub> ) | .                                    |
| .                                    | .                                    | .                                             | Use of supplements (Iron)            |

25OHD=25-hydroxyvitamin D ; GNRI: Geriatric Nutritional Risk Index; BMI: body mass index; eGFR: estimated glomerular filtration rate; \*: variables were forced in every model (\*\*even if non-significant at  $p < 0.25$ ); -: variable not significant at  $p < 0.25$ ; . : not investigated (see Methods); cut-offs for subclinical micronutrient deficiency: <50 nmol/L (25OHD); <13.6 nmol/L (folate); <221 pmol/L (vitamin B<sub>12</sub>); men: <11.6 μmol/L, women: <9.0 μmol/L (iron)

## 1 References

- 2 1. Ahrens, W.; Bellach, B.-M.; Jöckel, K.-H. [Measurement and quantification of sociodemographic  
3 characteristics in epidemiological studies]. German Society for Medical Informatics, Biometry and  
4 Epidemiology (GMDS). 1998. Available online:  
5 [https://dgepi.de/fileadmin/pdf/leitlinien/11\\_MessungUndQuantifizierungSoziodemographischerMer](https://dgepi.de/fileadmin/pdf/leitlinien/11_MessungUndQuantifizierungSoziodemographischerMerkmale_pdf2.pdf)  
6 [kmale\\_pdf2.pdf](https://dgepi.de/fileadmin/pdf/leitlinien/11_MessungUndQuantifizierungSoziodemographischerMerkmale_pdf2.pdf) (accessed on 14 November 2017).
- 7 2. Bouillanne, O.; Morineau, G.; Dupont, C.; Coulombel, I.; Vincent, J.P.; Nicolis, I.; Benazeth, S.;  
8 Cynober, L.; Aussel, C. Geriatric Nutritional Risk Index: a new index for evaluating at-risk elderly  
9 medical patients. *Am J Clin Nutr* 2005, 82, 777-783.
- 10 3. Keller, H.H.; Goy, R.; Kane, S.L. Validity and reliability of SCREEN II (Seniors in the community: risk  
11 evaluation for eating and nutrition, Version II). *Eur J Clin Nutr* 2005, 59, 1149-1157.  
12 10.1038/sj.ejcn.1602225.
- 13 4. Meisinger, C.; Lowel, H.; Thorand, B.; Doring, A. Leisure time physical activity and the risk of type 2  
14 diabetes in men and women from the general population. The MONICA/KORA Augsburg Cohort  
15 Study. *Diabetologia* 2005, 48, 27-34. 10.1007/s00125-004-1604-3.
- 16 5. Doring, A.; Filipiak, B.; Stieber, J.; Keil, U. Trends in alcohol intake in a southern German population  
17 from 1984-1985 to 1989-1990: results of the MONICA Project Augsburg. *J Stud Alcohol* 1993, 54, 745-749.
- 18 6. Strobl, R.; Muller, M.; Emeny, R.; Peters, A.; Grill, E. Distribution and determinants of functioning and  
19 disability in aged adults--results from the German KORA-Age study. *BMC Public Health* 2013, 13, 137.  
20 10.1186/1471-2458-13-137.
- 21 7. Fried, L.P.; Tangen, C.M.; Walston, J.; Newman, A.B.; Hirsch, C.; Gottdiener, J.; Seeman, T.; Tracy, R.;  
22 Kop, W.J.; Burke, G., et al. Frailty in older adults: evidence for a phenotype. *J Gerontol A Biol Sci Med Sci*  
23 2001, 56, M146-156.
- 24 8. Inker, L.A.; Schmid, C.H.; Tighiouart, H.; Eckfeldt, J.H.; Feldman, H.I.; Greene, T.; Kusek, J.W.; Manzi,  
25 J.; Van Lente, F.; Zhang, Y.L., et al. Estimating glomerular filtration rate from serum creatinine and  
26 cystatin C. *N Engl J Med* 2012, 367, 20-29. 10.1056/NEJMoa1114248.
- 27 9. Kirchberger, I.; Meisinger, C.; Heier, M.; Zimmermann, A.K.; Thorand, B.; Autenrieth, C.S.; Peters, A.;  
28 Ladwig, K.H.; Doring, A. Patterns of multimorbidity in the aged population. Results from the  
29 KORA-Age study. *PLoS One* 2012, 7, e30556. 10.1371/journal.pone.0030556.
- 30 10. Mühlberger, N.; Behrend, C.; Stark, R.; Holle, R. [Database-supported identification and entry of drug  
31 data in health studies - experience with the IDOM software]. *Informatik Biometrie und Epidemiologie in*  
32 *Medizin und Biologie* 2003, 34, 601-611.
- 33 11. Schwab, S.; Heier, M.; Schneider, A.; Fischer, B.; Huth, C.; Peters, A.; Thorand, B. The use of dietary  
34 supplements among older persons in southern Germany - results from the KORA-age study. *J Nutr*  
35 *Health Aging* 2014, 18, 510-519. 10.1007/s12603-013-0418-8.

36

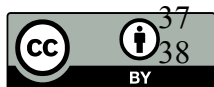

37 © 2017 by the authors. Submitted for possible open access publication under the  
38 terms and conditions of the Creative Commons Attribution (CC BY) license  
(<http://creativecommons.org/licenses/by/4.0/>).
